# Supplementary material for: Genome-wide identification and analysis of cystatin family genes in Sorghum (Sorghum bicolor (L.) Moench)
Source: PubMed Central journal article supplement (PMC7827979; doi:10.7717/peerj.10617), 2021-01-21
Supplement: peerj-09-10617-s001.pdf [file peerj-09-10617-s001.pdf]

**Fig. S1.** Amino acid sequence of conserved motifs in SbCys proteins.

**Motif 1**

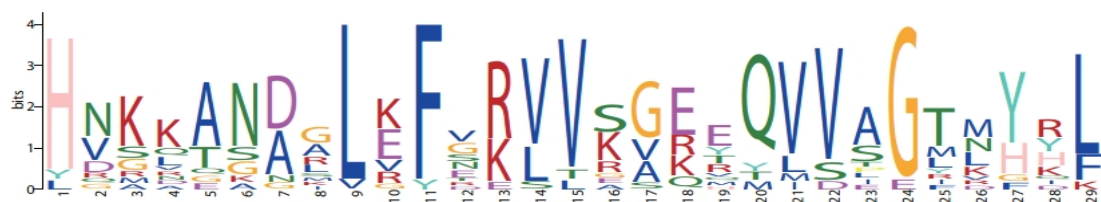

|          |     |          |            |                               |             |
|----------|-----|----------|------------|-------------------------------|-------------|
| SbCys5   | 73  | 2.66e-27 | QEVGRWAVSE | HVKKANDGLKFSRVVSGQYQVVEGFNYRL | IIDATDSHGK  |
| SbCys15  | 87  | 5.90e-26 | IELARFAVDE | HNSKTNAMLEFERLVKVRHQVVAGTMHHF | TVQVKEAGGG  |
| SbCys11  | 65  | 5.77e-25 | QELARFAVEE | HNKKANALLGYEKLVKAKTQVVAGTMYYL | TVEVKDGEVK  |
| SbCys17  | 29  | 1.71e-24 | IKLVCFTNAE | HNGKTNAILKRVRSVKVRYQVVAGTMHQF | TVKVKEAGST  |
| SbCys2_2 | 61  | 1.71e-24 | QELGRWAVSE | HGKQASDRLVFGKVVSGEEQIVAGTKYKL | VIQATRAGAG  |
| SbCys10  | 63  | 4.41e-24 | DGLGRFAVDE | HNKRENALLEFVRVVEAKEQVVAGTLHHL | TLEAIEAGKK  |
| SbCys16  | 107 | 1.51e-23 | IELARFAVAE | HNSKTNAALEFVRLVKVRTQLVAGRMYF  | TVEVREVDGG  |
| SbCys2_1 | 61  | 8.02e-23 | QEIGRWAVSE | HDAAASDSLVSFVVRGEEQVVAGTNYKL  | VIEATKGAGG  |
| SbCys4   | 141 | 1.42e-22 | QELGGWAVTE | HVRVANDGLRFGEVTSGEQQVSGMNYRL  | VLHATDADGD  |
| SbCys9   | 84  | 1.07e-20 | QKIARWAVTE | HVMLANDGLKFNKLVSGEVYVSLGYLYHL | IIDASDRDGK  |
| SbCys3   | 68  | 1.16e-20 | LGGWALGQAK | YQKLAANALRFRVVRGEEQVSGMRYRL   | YVDAADRAGR  |
| SbCys14  | 59  | 3.19e-20 | EDAARFAVAH | HNKNQGAALFTRVLKSKRQVVTGTLHDL  | I LEAADAGKK |
| SbCys13  | 55  | 3.34e-19 | QYIGRWAVAE | HVKQAKDGLKFDKVVGGEMMSIGIDFRL  | VIDASSTSDG  |
| SbCys12  | 85  | 8.74e-17 | RFSVAEYNRQ | LRGDGGGRLEFGRVVAAQRQVVSGLKYYL | RVAAVEEGAQ  |
| SbCys1   | 49  | 5.56e-16 | QQLGRWAVTE | HDKKANDKVKFNRVVSGEETLDPVLGVIK | YHLVIDASDG  |

**Motif 2**

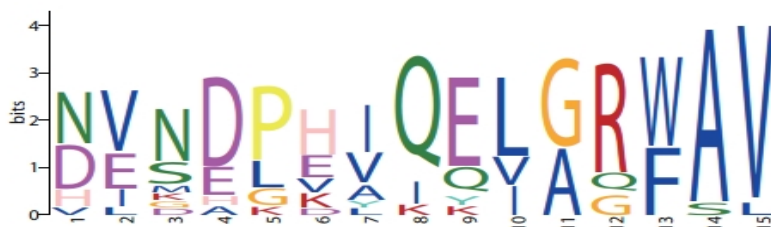

|          |     |          |            |                 |            |
|----------|-----|----------|------------|-----------------|------------|
| SbCys2_2 | 44  | 6.77e-20 | PQAVGGWKPI | NVNDPHIQELGRWAV | SEHGKQASDR |
| SbCys2_1 | 44  | 1.99e-18 | ENVGRWTPIT | DVNDPEIQEIGRWAV | SEHDAAASDS |
| SbCys5   | 56  | 2.36e-17 | LQGGFYQPIV | NINDPHVQEVGRWAV | SEHVKKANDG |
| SbCys4   | 124 | 4.54e-15 | PLAGGWSPIR | NVSEPHIQELGGWAV | TEHVRVANDG |
| SbCys11  | 48  | 5.01e-15 | LAGGIKDVPA | NENDLHLQELARFAV | EEHNKKANAL |
| SbCys9   | 67  | 1.20e-14 | TSTMAETTP  | NVNDPVYQKIARWAV | TEHVMLANDG |
| SbCys8   | 97  | 1.17e-13 | PPASNWTPVA | NVKDPKIQQVAQFAV | RIHALSSTEL |
| SbCys3   | 49  | 6.34e-13 | PLLGGWNPIP | DVGDKHIQELGGWAL | GQAKYQKLAA |
| SbCys1   | 32  | 8.78e-13 | ADSQGWFFLP | DIDAPKVQQLGRWAV | TEHDKKANDK |
| SbCys13  | 38  | 1.80e-12 | AQTFGVWYPV | DLSEGHVQYIGRWAV | AEHVKQAKDG |
| SbCys14  | 70  | 1.80e-12 | VGDVRDAPEG | HENDLEAIELARFAV | DEHNSKTNAM |
| SbCys15  | 64  | 4.95e-12 | KVGARTEVRD | VESDGEVQELGRFSV | AEYNRQLRGD |
| SbCys16  | 90  | 4.18e-11 | LCGGVVDAPG | HEMHPDAIELARFAV | AEHNSKTNAA |
| SbCys7   | 31  | 6.85e-11 | SAQAAWVPVL | DVNELVIKQVAQFAV | LVIYGLAHRD |

### Motif3

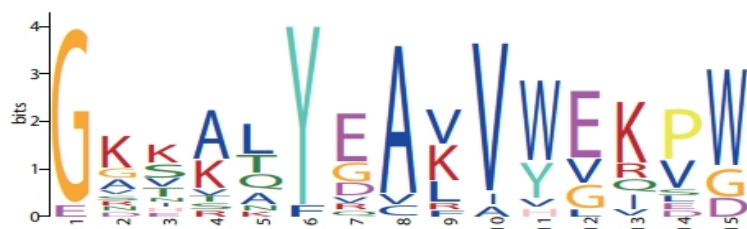

|          |     |          |                                              |
|----------|-----|----------|----------------------------------------------|
| SbCys10  | 99  | 2.47e-17 | HHLTLEAIEA <b>GKKKLYEAKVWVKPW</b> LNFKELQDFS |
| SbCys15  | 124 | 9.24e-16 | HFTVQVKEAG <b>GGKKLYEAKVWEKVV</b> ENFKQLQSFQ |
| SbCys14  | 95  | 1.05e-14 | HDLILEAADA <b>GKKSlyRAKVVVKPW</b> EDFKSVVEFR |
| SbCys5   | 110 | 1.94e-14 | RLIIDATDSH <b>GKVAKYEAVVWEKEW</b> ENFLQLTSFK |
| SbCys11  | 101 | 3.15e-14 | YYLTVEVKDG <b>EVKKLYEAKVWEKPV</b> ENFKELQEFK |
| SbCys16  | 145 | 7.93e-14 | FTVEVREVDG <b>GASKLYEAKVWLRPW</b> ENFKGLHAFD |
| SbCys2_1 | 99  | 1.23e-12 | LVIEATKGAG <b>GKIATYGAVVYEKVD</b> NTRQLLSFAP |
| SbCys13  | 93  | 2.22e-12 | LVIDASSTSD <b>GKHANYEARVHERDW</b> MDGISLLSFK |
| SbCys2_2 | 100 | 2.69e-12 | VIQATRAGAG <b>GNSATYGAVVYEKVD</b> KTRQLLSFSP |
| SbCys8   | 151 | 1.40e-11 | NYRLLITVSG <b>GKNTQYEAfVWGILG</b> TTSWKLLSFT |
| SbCys7   | 89  | 1.53e-11 | VVVAARPDDG <b>GSTAQYDCLVWGVPG</b> SRSDTWKLRR |
| SbCys4   | 178 | 2.37e-11 | RLVLHATDAD <b>GDVAAYGALVYEQSW</b> TNTRELMSFA |
| SbCys3   | 105 | 9.88e-11 | RLYVDAADRA <b>GRSVTYVAVIYEQVW</b> TNTRKLASFT |
| SbCys12  | 126 | 1.01e-9  | AAVEEGAQNA <b>GGERAFDAVVVKPW</b> LESRTLLTFA  |
| SbCys6   | 85  | 1.46e-9  | KMVVTAADAS <b>GATAQYQVLAWGIPG</b> TYQWMLLEFK |

### Motif4

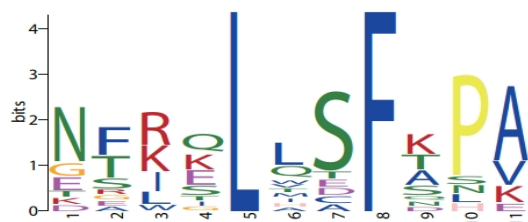

|          |     |          |                                          |
|----------|-----|----------|------------------------------------------|
| SbCys15  | 140 | 8.21e-12 | EAKVWEKWE <b>NFKQLQSFQEV</b> GDAAVA      |
| SbCys5   | 126 | 1.23e-11 | EAVVWEKEWE <b>NFLQLTSFKPA</b> N          |
| SbCys2_1 | 114 | 9.57e-11 | YGAVVYEKVD <b>NTRQLLSFAPE</b> N          |
| SbCys2_2 | 115 | 1.90e-10 | YGAVVYEKVD <b>KTRQLLSFSPA</b> N          |
| SbCys11  | 117 | 1.34e-9  | EAKVWEKPWE <b>NFKELQEFKPV</b> EEGASA     |
| SbCys4   | 194 | 1.62e-9  | GALVYEQSWT <b>NRELMSFASA</b> N           |
| SbCys13  | 109 | 1.78e-9  | EARVHERDWM <b>DGISLLSFKPA</b> K          |
| SbCys8   | 167 | 3.71e-9  | EAFVWGILGT <b>TSWKLLSFTPK</b> Y          |
| SbCys1   | 104 | 4.84e-9  | YEAVLGEEWI <b>GRIILISFNPA</b> R          |
| SbCys3   | 121 | 5.28e-9  | VAVIYEQVWT <b>NTRKLASFTLA</b> SRAH       |
| SbCys9   | 137 | 6.27e-9  | TAVVRQSTLG <b>GELSLSWFKPA</b> N          |
| SbCys12  | 142 | 1.57e-8  | DAVVVKPWL <b>ESRTLLTFAPA</b> AAK         |
| SbCys10  | 115 | 1.85e-8  | EAKVWVKPWL <b>NFKELQDFSHK</b> GEATTFTNAD |
| SbCys16  | 161 | 5.07e-8  | EAKVWLRPWE <b>NFKGLHAFDPV</b> ADAA       |
| SbCys17  | 17  | 2.30e-7  | DTPAGCEKGL <b>EAIKLVCFNTA</b> EHNGKTNAIL |

## Motif5

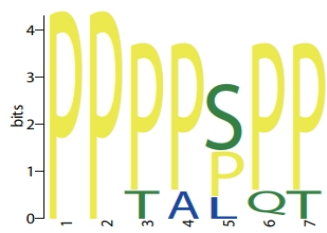

|         |    |         |            |         |            |
|---------|----|---------|------------|---------|------------|
| SbCys8  | 82 | 1.88e-9 | PSPPPPAYSS | PPPPPP  | ASNWTPVANV |
| SbCys8  | 41 | 1.88e-9 | TPSPLPDTPT | PPPPPP  | PSSSTAPPP  |
| SbCys8  | 69 | 3.98e-9 | SQPPPAASSS | PPPSPP  | PPAYSSPPPP |
| SbCys15 | 31 | 6.94e-9 | FPLAVVPVVS | PPPPLPP | GSRRRTASSA |
| SbCys5  | 33 | 2.72e-7 | MASRARGGRA | PPTPSPT | QAEIGRLQGG |
| SbCys8  | 55 | 4.61e-7 | PPPESSSTA  | PPASQP  | PPAASSSPPP |
