# Supplementary material for: Genome-wide identification and analysis of cystatin family genes in Sorghum (Sorghum bicolor (L.) Moench)
Source: PubMed Central journal article supplement (PMC7827979; doi:10.7717/peerj.10617), 2021-01-21

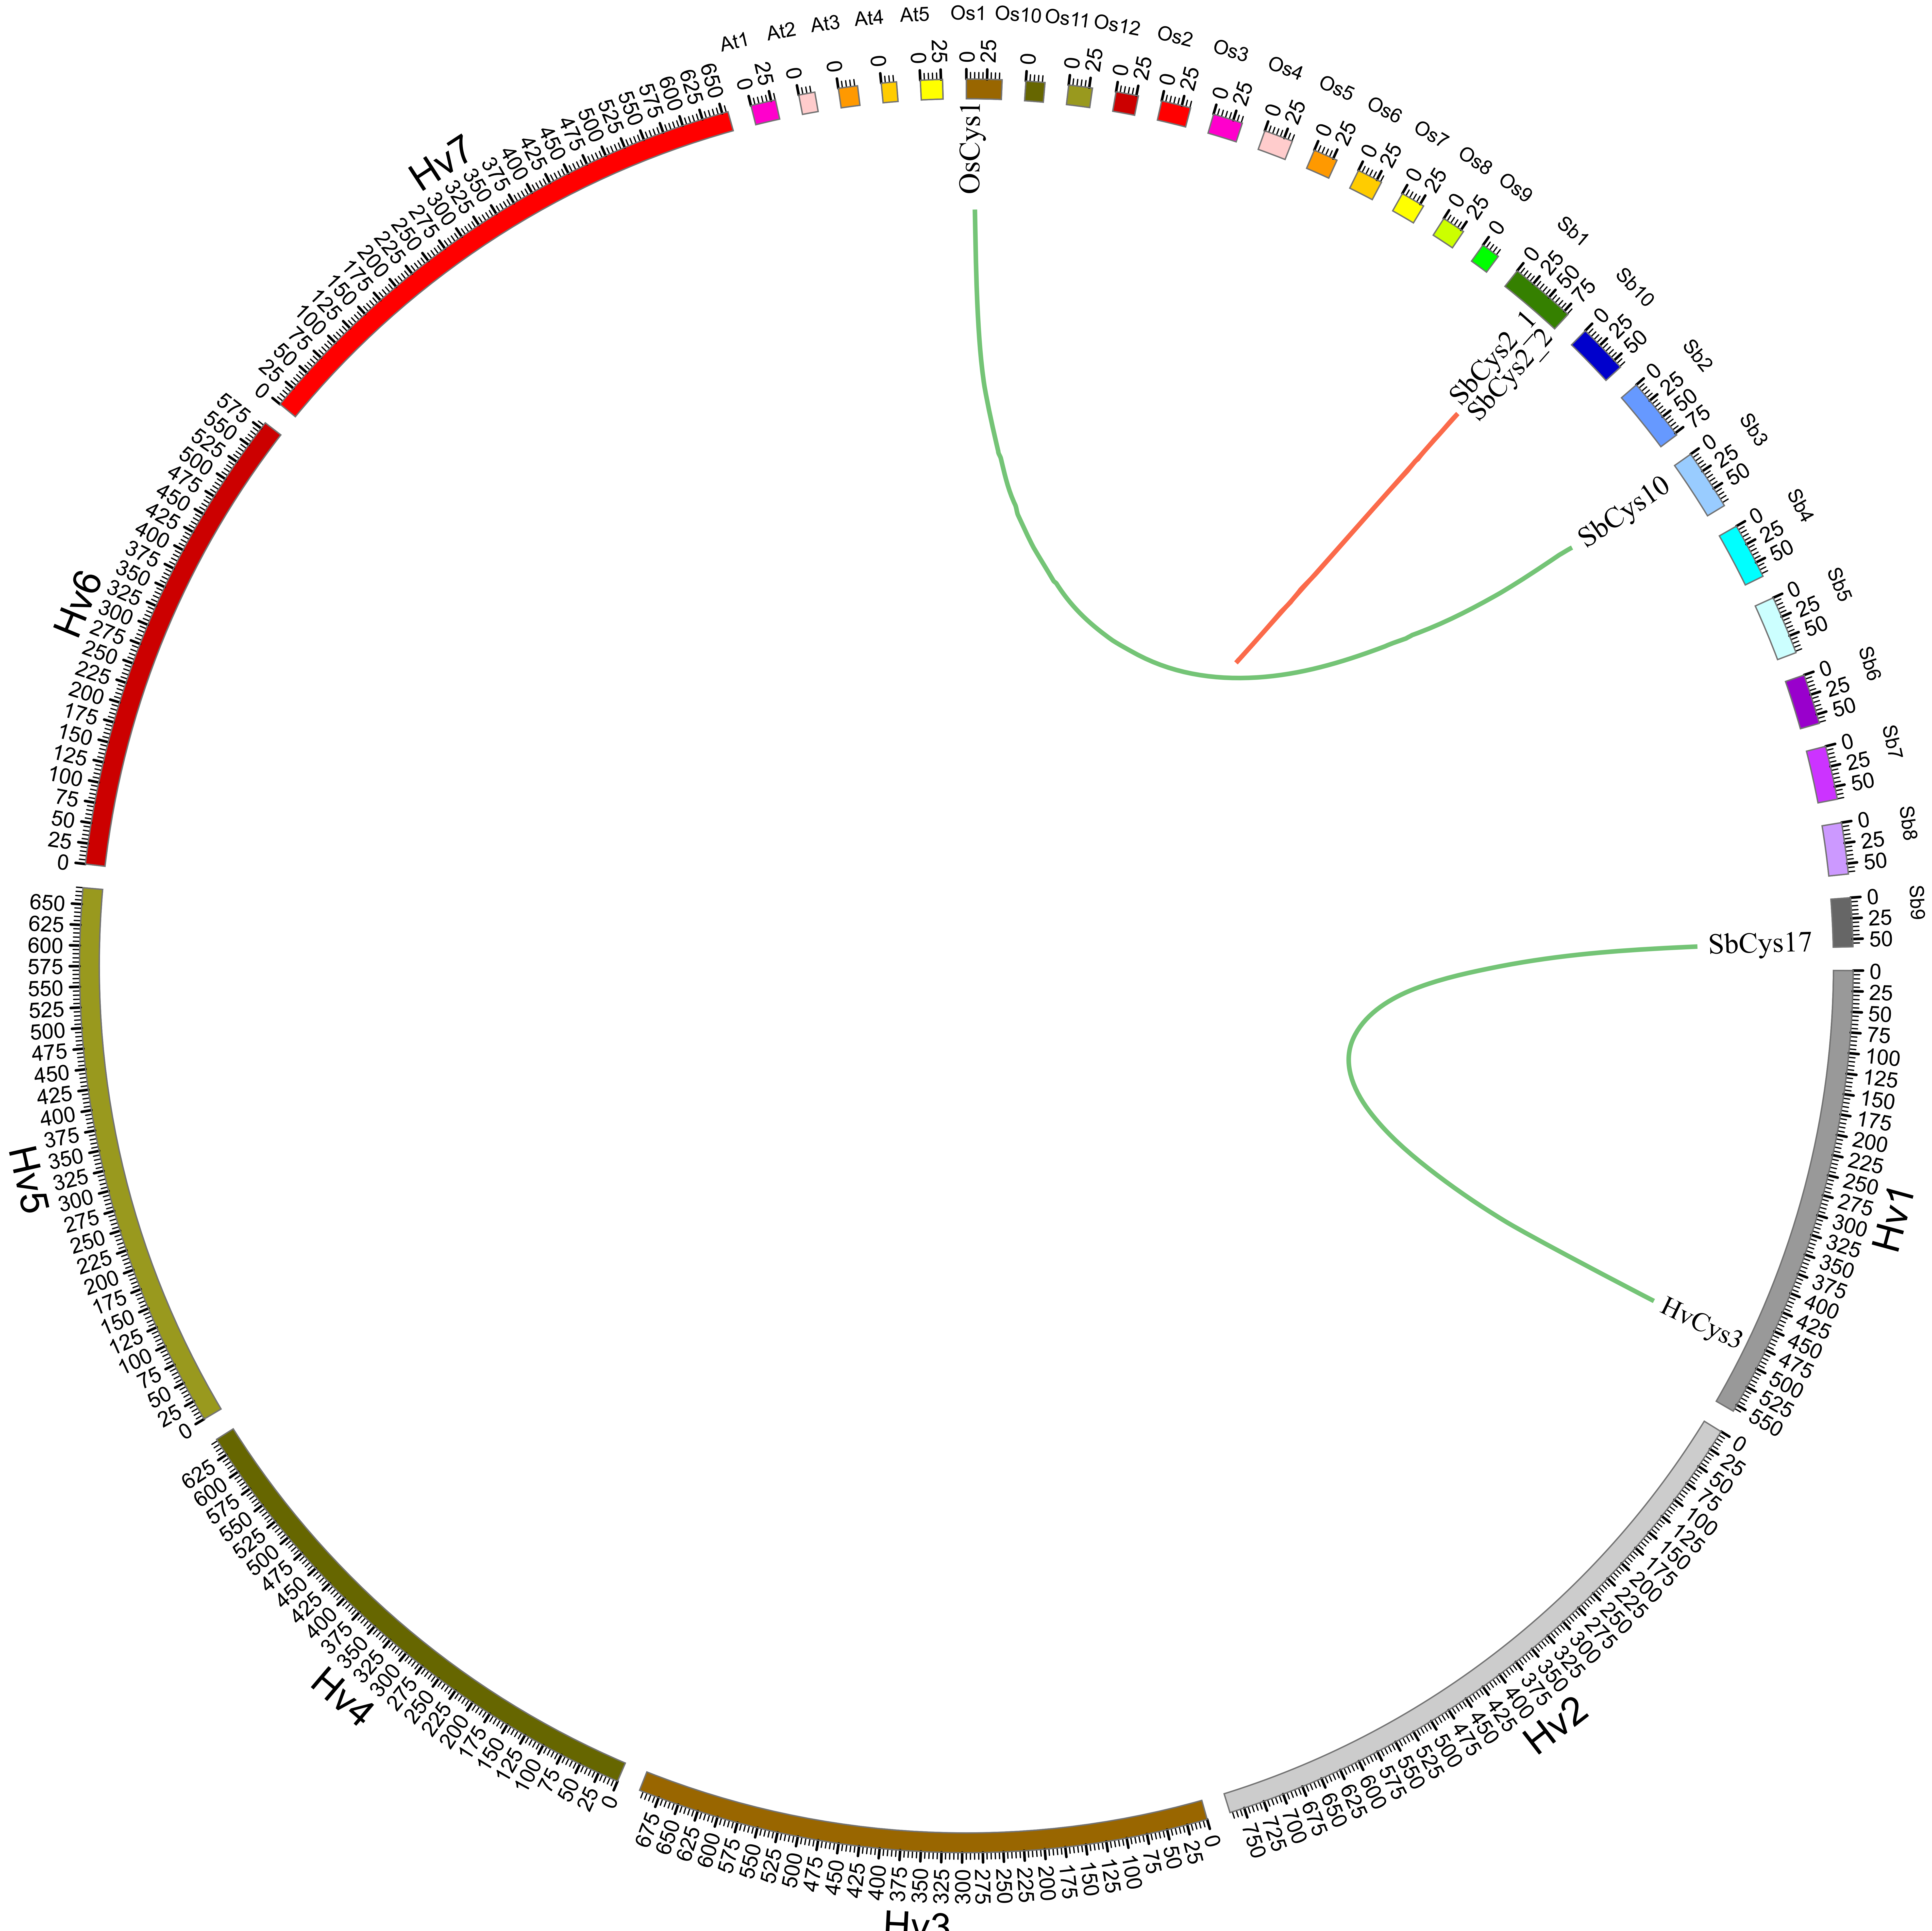



Supplement: peerj-09-10617-s002.pdf [file peerj-09-10617-s002.pdf]
