# Supplementary material for: Genome-wide identification and analysis of cystatin family genes in Sorghum (Sorghum bicolor (L.) Moench)
Source: PeerJ. 2021 Jan 21;9:e10617. doi: 10.7717/peerj.10617 (PMC7827979; doi:10.7717/peerj.10617)
Supplement: Supplemental Information 4 [file peerj-09-10617-s004.xlsx]

## Sheet: Table S1
Table S1. The accession number and sample information of RNA-seq data.
Different tissues	Accession number	Tissue	Age
	ERR2096922	root	seedling developmental stage
	ERR2096921	root	seedling developmental stage
	ERR2096920	root	seedling developmental stage
	ERR2097052	shoot	seedling developmental stage
	ERR2097051	shoot	seedling developmental stage
	ERR2097050	shoot	seedling developmental stage
	ERR2097017	whole organism	seedling developmental stage
	ERR2097016	whole organism	seedling developmental stage
	ERR2097015	whole organism	seedling developmental stage
	ERR2097067	endosperm	20 days after pollination
	ERR2097066	endosperm	20 days after pollination
	ERR2097065	endosperm	20 days after pollination
	ERR2097037	plant embryo	20 days after pollination
	ERR2097036	plant embryo	20 days after pollination
	ERR2097035	plant embryo	20 days after pollination
	ERR2097022	inflorescence	inflorescence size 1 to 5 millimeter
	ERR2097021	inflorescence	inflorescence size 1 to 5 millimeter
	ERR2097020	inflorescence	inflorescence size 1 to 5 millimeter
	ERR2096987	inflorescence	inflorescence size 1 to 10 millimeter
	ERR2096986	inflorescence	inflorescence size 1 to 10 millimeter
	ERR2096985	inflorescence	inflorescence size 1 to 10 millimeter
	ERR2096972	inflorescence	inflorescence size 1 to 2 centimeter
	ERR2096971	inflorescence	inflorescence size 1 to 2 centimeter
	ERR2096970	inflorescence	inflorescence size 1 to 2 centimeter
	ERR2097002	pollen	booting stage
	ERR2097001	pollen	booting stage
	ERR2097000	pollen	booting stage
	ERR2096952	pericarp	20 days after pollination
	ERR2096951	pericarp	20 days after pollination
	ERR2096950	pericarp	20 days after pollination
Biotic stress
Treated	Accession number	Tissue	Treatment	Line
Sugarcane aphid infected	SRR7881700	leaf	control 5 days	Resistant line RTx2783
	SRR7881701	leaf	control 5 days
	SRR7881704	leaf	control 5 days
	SRR7881705	leaf	infected 5 days
	SRR7881722	leaf	infected 5 days
	SRR7881723	leaf	infected 5 days
	SRR7881729	leaf	control 10 days
	SRR7881730	leaf	control 10 days
	SRR7881711	leaf	control 10 days
	SRR7881710	leaf	infected 10 days
	SRR7881709	leaf	infected 10 days
	SRR7881708	leaf	infected 10 days
	SRR7881718	leaf	control 15 days
	SRR7881719	leaf	control 15 days
	SRR7881728	leaf	control 15 days
	SRR7881731	leaf	infected 15 days
	SRR7881716	leaf	infected 15 days
	SRR7881717	leaf	infected 15 days
	SRR7881698	leaf	control 5 days	Susceptible line BCK60
	SRR7881699	leaf	control 5 days
	SRR7881696	leaf	control 5 days
	SRR7881697	leaf	infected 5 days
	SRR7881702	leaf	infected 5 days
	SRR7881703	leaf	infected 5 days
	SRR7881720	leaf	control 10 days
	SRR7881721	leaf	control 10 days
	SRR7881726	leaf	control 10 days
	SRR7881727	leaf	infected 10 days
	SRR7881724	leaf	infected 10 days
	SRR7881725	leaf	infected 10 days
	SRR7881713	leaf	control 15 days
	SRR7881714	leaf	control 15 days
	SRR7881715	leaf	control 15 days
	SRR7881706	leaf	infected 15 days
	SRR7881707	leaf	infected 15 days
	SRR7881712	leaf	infected 15 days
