# Supplementary material for: Genome-wide identification and analysis of cystatin family genes in Sorghum (Sorghum bicolor (L.) Moench)
Source: PeerJ. 2021 Jan 21;9:e10617. doi: 10.7717/peerj.10617 (PMC7827979; doi:10.7717/peerj.10617)
Supplement: Supplemental Information 6 [file peerj-09-10617-s006.xlsx]

## Sheet: Sheet1
Table S3 Gene name, chromosomal location, amino acid sequence, and functional annotations of identified Sorghum cystatins.
Gene Name	Gene ID (Phytozome database)	Gene ID	Entry name (Uniprot database)	GenBank name	Chromosomal location	Number of amino acid	Amino acid sequence	GO annotation
SbCys7	Sobic.001G487500.1	SORBI_3001G487500	C5WVW8	EER92772	Chr01:75758166..75758839	120	MRSSPVVLPLLAAALLVASSSAQAAWVPVLDVNELVIKQVAQFAVLVYGLAHHRDLAYVG VVRGQTEQAVGGGTNFRLVVVAARPDDGGSTAQYDCLVWGVPGSRSDTWKLRRFRKIVQG	Biological Process::inhibition of cysteine-type endopeptidase activity(GO:0097340 );;Biological Process::negative regulation of peptidase activity(GO:0010466 );;Biological Process::negative regulation of endopeptidase activity(GO:0010951 );;Biological Process::negative regulation of proteolysis(GO:0045861 );;Molecular Function::cysteine-type endopeptidase inhibitor activity(GO:0004869);;Molecular…
SbCys6	Sobic.001G487300.1	SORBI_3001G487300	C5WVW6	EER92770	Chr01:75749676..75750273	112	MRSLIALAVVLVVVAGAASAKFVDPPDSDVPAGTRPPQIGRFAVLVYNLNRGAKLKYAGV SNSERHPHRGGVRYKMVVTAADASGATAQYQVLAWGIPGTYQWMLLEFKKIN	Biological Process::inhibition of cysteine-type endopeptidase activity(GO:0097340 );;Biological Process::negative regulation of peptidase activity(GO:0010466 );;Biological Process::negative regulation of endopeptidase activity(GO:0010951 );;Biological Process::negative regulation of proteolysis(GO:0045861 );;Biological Process::negative regulation of cell-substrate adhesion(GO:0010812 );;Molecula…
SbCys8	Sobic.001G487800.1	SORBI_3001G487800	C5WVX1	EER92775	Chr01:75769351..75770240	178	MARPSVLVVVLPIVLATLLATANAQDYTAPTPSPLPDTPTPPPPPPPPESSSTAPPPASQ PPPAASSSPPPPSPPPPAYSSPPPPPPPASNWTPVANVKDPKIQQVAQFAVRIHALSSTE LNMQLQIVVSGETQPCNGGYNYRLLITVSGGKNTQYEAFVWGILGTTSWKLLSFTPKY	Biological Process::inhibition of cysteine-type endopeptidase activity(GO:0097340 );;Biological Process::negative regulation of peptidase activity(GO:0010466 );;Biological Process::negative regulation of endopeptidase activity(GO:0010951 );;Biological Process::negative regulation of proteolysis(GO:0045861 );;Biological Process::negative regulation of cell-substrate adhesion(GO:0010812 );;Molecula…
SbCys2_2	Sobic.001G324600.1	SORBI_3001G324600	C5WVG7	EER92057	Chr01:61173195..61173795	126	MRTLISMLVVAAAAVVGLCSVAPAASARGEPPVPQAVGGWKPINVNDPHIQELGRWAVSE HGKQASDRLVFGKVVSGEEQIVAGTKYKLVIQATRAGAGGNSATYGAVVYEKVDKTRQLL SFSPAN	Biological Process::inhibition of cysteine-type endopeptidase activity(GO:0097340 );;Biological Process::negative regulation of peptidase activity(GO:0010466 );;Biological Process::negative regulation of endopeptidase activity(GO:0010951 );;Biological Process::negative regulation of proteolysis(GO:0045861 );;Biological Process::negative regulation of cell-substrate adhesion(GO:0010812 );;Molecula…
SbCys2_1	Sobic.001G324500.1	SORBI_3001G324500	C5WVG6	EER92056	Chr01:61170069..61170647	125	MMRALISMLIVAAAVVGLCSVAPAASAREAPLPENVGRWTPITDVNDPEIQEIGRWAVSE HDAAASDSLVFSKVVRGEEQVVAGTNYKLVIEATKGAGGKIATYGAVVYEKVDNTRQLLS FAPEN	Biological Process::inhibition of cysteine-type endopeptidase activity(GO:0097340 );;Biological Process::negative regulation of peptidase activity(GO:0010466 );;Biological Process::negative regulation of endopeptidase activity(GO:0010951 );;Biological Process::negative regulation of proteolysis(GO:0045861 );;Biological Process::negative regulation of cell-substrate adhesion(GO:0010812 );;Molecula…
SbCys4	Sobic.001G324700.1	SORBI_3001G324700	A0A1Z5S8P9	OQU92301	Chr01:61198278..61199489	205	MQEVTRRRPKPNQGPPLPQMTLLITYATPAASHTAVVDFGSVPCLTIKSQRLPLRSPRHV LIPARARQTTRSSTSQRPKPNPMATTRALLLTTTAAALLLLLAGGGGAAAARGPLAGGWS PIRNVSEPHIQELGGWAVTEHVRVANDGLRFGEVTSGEQQVVSGMNYRLVLHATDADGDV AAYGALVYEQSWTNTRELMSFASAN	Biological Process::inhibition of cysteine-type endopeptidase activity(GO:0097340 );;Biological Process::negative regulation of peptidase activity(GO:0010466 );;Biological Process::negative regulation of endopeptidase activity(GO:0010951 );;Biological Process::negative regulation of proteolysis(GO:0045861 );;Biological Process::negative regulation of cell-substrate adhesion(GO:0010812 );;Molecula…
SbCys3	Sobic.001G324800.1	SORBI_3001G324800	C5WVG9	EER92059	Chr01:61201114..61201921	135	MATPGHHLPLLLLVLATLAAAAFAVAPVPGPAALGGGGPLLGGWNPIPDVGDKHIQELGG WALGQAKYQKLAANALRFRRVVRGEEQVVSGMRYRLYVDAADRAGRSVTYVAVIYEQVWT NTRKLASFTLASRAH	Biological Process::inhibition of cysteine-type endopeptidase activity(GO:0097340 );;Biological Process::negative regulation of peptidase activity(GO:0010466 );;Biological Process::negative regulation of endopeptidase activity(GO:0010951 );;Biological Process::negative regulation of proteolysis(GO:0045861 );;Biological Process::negative regulation of cell-substrate adhesion(GO:0010812 );;Molecula…
SbCys14	Sobic.009G135900.1	SORBI_3009G135900	C5YXT0	EES18222	Chr09:49126974..49129645	174	MPRCAVVVLFAAVLLAASAAAVSGFHLGGDESGLVRGVLAALRERAEAEDAARFAVAHHN KNQGAALEFTRVLKSKRQVVTGTLHDLILEAADAGKKSLYRAKVWVKPWEDFKSVVEFRL VGDSESESESSVTSDVSSGQAIAKLSLEADIAQEEAHLHTIENDGLSGDFASSS	Biological Process::inhibition of cysteine-type endopeptidase activity(GO:0097340 );;Biological Process::negative regulation of peptidase activity(GO:0010466 );;Biological Process::negative regulation of endopeptidase activity(GO:0010951 );;Biological Process::negative regulation of proteolysis(GO:0045861 );;Biological Process::negative regulation of cell-substrate adhesion(GO:0010812 );;Molecula…
SbCys10	Sobic.003G126800.1	SORBI_3003G126800	A0A1B6Q6M7	EES02749	Chr03:11616309..11619063	240	MRVAATRLAAAPPPIRFLFLLVLLGSAIGAAMAGHVLGGVKENPAAANSAESDGLGRFAV DEHNKRENALLEFVRVVEAKEQVVAGTLHHLTLEAIEAGKKKLYEAKVWVKPWLNFKELQ DFSHKGEATTFTNADLGAKKGEHEPGWREVPIEDPVVKDAAHHAVKSIQERSNSLFPYEL LEIVRAKAQVVEDFAKFDILMKLKRGSKEEKIKAEVHKSLEGAFVLNKHQPAEHEESSSQ	Biological Process::inhibition of cysteine-type endopeptidase activity(GO:0097340 );;Biological Process::negative regulation of peptidase activity(GO:0010466 );;Biological Process::negative regulation of endopeptidase activity(GO:0010951 );;Biological Process::negative regulation of proteolysis(GO:0045861 );;Biological Process::negative regulation of cell-substrate adhesion(GO:0010812 );;Molecula…
SbCys15	Sobic.009G182000.1	SORBI_3009G182000	C5Z0A3	EES19739	Chr09:53582622..53584309	156	MRIWLRGATTIRRCKCYSCSFPLAVVPVVSPPPPLPPGSRRRTASSAMAEAHSGRRVGMV GDVRDAPEGHENDLEAIELARFAVDEHNSKTNAMLEFERLVKVRHQVVAGTMHHFTVQVK EAGGGKKLYEAKVWEKVWENFKQLQSFQPVGDAAVA	Biological Process::inhibition of cysteine-type endopeptidase activity(GO:0097340 );;Biological Process::negative regulation of peptidase activity(GO:0010466 );;Biological Process::negative regulation of endopeptidase activity(GO:0010951 );;Biological Process::negative regulation of proteolysis(GO:0045861 );;Biological Process::negative regulation of cell-substrate adhesion(GO:0010812 );;Molecula…
SbCys17	Sobic.009G184500.2	SORBI_3009G184500	A0A1Z5R3Y5	OQU78239	Chr09:53784290..53784891	105	MVDDVQDTPAGCEKGLEAIKLVCFTNAEHNGKTNAILKFVRSVKVRYQVVAGTMHQFTVK VKEAGSTKKLYKAKVWAMWKNFKQLQMPQSPDLRLTGFSLEAAGA	Biological Process::inhibition of cysteine-type endopeptidase activity(GO:0097340 );;Biological Process::negative regulation of peptidase activity(GO:0010466 );;Biological Process::negative regulation of endopeptidase activity(GO:0010951 );;Biological Process::negative regulation of proteolysis(GO:0045861 );;Biological Process::negative regulation of cell-substrate adhesion(GO:0010812 );;Molecula…
SbCys16	Sobic.009G182100.1	SORBI_3009G182100	A0A1B6P938	KXG22254	Chr09:53587218..53588922	175	MRCDATQRSRETAQYSMSLLRGVQRLALGVAAAAAARGRLPLAALLRFRFSSAYYYPTSA AAARSRFLATGSRMLAPDLLCGGVVDAPGHEMHPDAIELARFAVAEHNSKTNAALEFVRL VKVRTQLVAGRMYYFTVEVREVDGGASKLYEAKVWLRPWENFKGLHAFDPVADAA	Biological Process::inhibition of cysteine-type endopeptidase activity(GO:0097340 );;Biological Process::negative regulation of peptidase activity(GO:0010466 );;Biological Process::negative regulation of endopeptidase activity(GO:0010951 );;Biological Process::negative regulation of proteolysis(GO:0045861 );;Biological Process::negative regulation of cell-substrate adhesion(GO:0010812 );;Molecula…
SbCys11	Sobic.003G327700.2	SORBI_3003G327700	A0A1B6Q6M7	EES02749	Chr03:65332341..65333737	133	MRKHRIVPLVAALLVLLALAVSSTRNRNAQEGEESMALAGGIKDVPANENDLHLQELARF AVEEHNKKANALLGYEKLVKAKTQVVAGTMYYLTVEVKDGEVKKLYEAKVWEKPWENFKE LQEFKPVEEGASA	Biological Process::inhibition of cysteine-type endopeptidase activity(GO:0097340 );;Biological Process::negative regulation of peptidase activity(GO:0010466 );;Biological Process::negative regulation of endopeptidase activity(GO:0010951 );;Biological Process::negative regulation of proteolysis(GO:0045861 );;Biological Process::negative regulation of cell-substrate adhesion(GO:0010812 );;Molecula…
SbCys12	Sobic.003G400400.1	SORBI_3003G400400	C5XG67	EES01950	Chr03:70901405..70902262	155	MDPRALGAGMLLAVLLMAATAAASARPDDDDVAGSGAGAGGIRQPASDGYRGRKVGARTE VRDVESDGEVQELGRFSVAEYNRQLRGDGGGRLEFGRVVAAQRQVVSGLKYYLRVAAVEE GAQNAGGERAFDAVVVVKPWLESRTLLTFAPAAAK	Biological Process::inhibition of cysteine-type endopeptidase activity(GO:0097340 );;Biological Process::negative regulation of peptidase activity(GO:0010466 );;Biological Process::negative regulation of endopeptidase activity(GO:0010951 );;Biological Process::negative regulation of proteolysis(GO:0045861 );;Biological Process::negative regulation of cell-substrate adhesion(GO:0010812 );;Molecula…
SbCys5	Sobic.001G461600.1	SORBI_3001G461600	C5WTN5	EER95296	Chr01:73642235..73642936	137	MRTSHLVVMAATAIFIAATTPAMASRARGGRAPPTPSPTQAEIGRLQGGFYQPIVNINDP HVQEVGRWAVSEHVKKANDGLKFSRVVSGQYQVVEGFNYRLIIDATDSHGKVAKYEAVVW EKEWENFLQLTSFKPAN	Biological Process::inhibition of cysteine-type endopeptidase activity(GO:0097340 );;Biological Process::negative regulation of peptidase activity(GO:0010466 );;Biological Process::negative regulation of endopeptidase activity(GO:0010951 );;Biological Process::negative regulation of proteolysis(GO:0045861 );;Biological Process::negative regulation of cell-substrate adhesion(GO:0010812 );;Molecula…
SbCys1	Sobic.001G183500.1	SORBI_3001G183500	C5WUA7	EER93890	Chr01:15595224..15602909	115	MRTSFLLLAAAICAVVASVVSADSQGWFPLPDIDAPKVQQLGRWAVTEHDKKANDKVKFN RVVSGEETLDPELVGIKYHLVIDASDGSGQHRKYEAVLGEEWIGRIILISFNPAR	Biological Process::inhibition of cysteine-type endopeptidase activity(GO:0097340 );;Biological Process::negative regulation of peptidase activity(GO:0010466 );;Biological Process::negative regulation of endopeptidase activity(GO:0010951 );;Biological Process::negative regulation of proteolysis(GO:0045861 );;Biological Process::negative regulation of cell-substrate adhesion(GO:0010812 );;Molecula…
SbCys9	Sobic.002G352401.1	SORBI_3002G352401	A0A109ND26	OQU90155	Chr02:71576708..71577277	148	MRPGQALYLNAPKFSSDISLHHLITNLQIHHKIMASSTMRTGLLFVVVVAAIHAFATSTM AETTPINVNDPVYQKIARWAVTEHVMLANDGLKFNKLVSGEVYVSLGYLYHLIIDASDRD GKDARYTAVVRQSTLGGELSLWSFKPAN	Biological Process::inhibition of cysteine-type endopeptidase activity(GO:0097340 );;Biological Process::negative regulation of peptidase activity(GO:0010466 );;Biological Process::negative regulation of endopeptidase activity(GO:0010951 );;Biological Process::negative regulation of proteolysis(GO:0045861 );;Biological Process::negative regulation of cell-substrate adhesion(GO:0010812 );;Molecula…
SbCys13	Sobic.004G216100.1	SORBI_3004G216100	A0A194YQY2	KXG30639	Chr04:56591617..56592116	120	MRAAVLLGVLGIAIVAIHIVAMATPAMAQTFGVWYPVDLSEGHVQYIGRWAVAEHVKQAK DGLKFDKVVGGEMMMSIGIDFRLVIDASSTSDGKHANYEARVHERDWMDGISLLSFKPAK	Biological Process::inhibition of cysteine-type endopeptidase activity(GO:0097340 );;Biological Process::negative regulation of peptidase activity(GO:0010466 );;Biological Process::negative regulation of endopeptidase activity(GO:0010951 );;Biological Process::negative regulation of proteolysis(GO:0045861 );;Biological Process::negative regulation of cell-substrate adhesion(GO:0010812 );;Molecula…
