# Supplementary material for: Genome-wide identification and analysis of cystatin family genes in Sorghum (Sorghum bicolor (L.) Moench)
Source: PeerJ. 2021 Jan 21;9:e10617. doi: 10.7717/peerj.10617 (PMC7827979; doi:10.7717/peerj.10617)
Supplement: Supplemental Information 7 [file peerj-09-10617-s007.xlsx]

## Sheet: Sheet1
Table S4 The Ka/Ks analysis of SbCys genes
Duplicated pair	Ka	Ks	Ka/Ks	p-value
SbCys2_1-SbCys2_2	0.120173	0.255288	0.470734	0.0286205
SbCys2_1-SbCys3	0.442318	3.0474	0.145146	3.07e-13
SbCys2_1-SbCys5	0.481611	3.34133	0.144137	1.72e-15
SbCys2_1-SbCys4	0.34379	3.07015	0.111978	3.33e-17
SbCys2_2-SbCys5	0.369939	3.28099	0.112752	1.85e-17
SbCys2_2-SbCys13	0.450023	3.10643	0.144868	2.9e-11
SbCys2_2-SbCys4	0.310949	3.04793	0.10202	1.5e-18
SbCys3-SbCys2_2	0.431145	3.08582	0.139718	2.02e-16
SbCys3-SbCys5	0.555764	3.24517	0.171259	3.02e-17
SbCys3-SbCys4	0.321311	2.9151	0.110223	3.15e-17
SbCys6-SbCys7	0.467282	2.89426	0.161451	3.92e-19
SbCys6-SbCys8	0.638544	3.10647	0.205553	3.96e-10
SbCys6-SbCys1	0.722751	3.56342	0.202825	3.97e-05
SbCys6-SbCys14	0.801012	3.20111	0.25023	8.35e-07
SbCys7-SbCys2_1	0.537848	3.03174	0.177405	1.09e-08
SbCys7-SbCys2_2	0.579478	3.00705	0.192707	1.24e-06
SbCys7-SbCys8	0.563344	3.99651	0.140958	3.072e-15
SbCys8-SbCys2_1	0.571342	3.19492	0.178828	2.12e-17
SbCys8-SbCys2_2	0.608251	3.19781	0.190208	6.1e-12
SbCys8-SbCys5	0.715201	3.4412	0.207835	3.58e-08
SbCys1-SbCys2_1	0.568152	2.2645	0.250895	1.76e-06
SbCys1-SbCys5	0.404839	1.46094	0.277109	2.48e-05
SbCys1-SbCys13	0.37194	1.83719	0.20245	3.89e-09
SbCys1-SbCys9	0.646977	1.1392	0.567923	0.069208
SbCys5-SbCys9	0.687014	2.82877	0.242866	0.000896819
SbCys5-SbCys4	0.468396	3.3535	0.139674	4.76e-15
SbCys12-SbCys2_1	0.599136	3.19546	0.187496	3.71e-10
SbCys12-SbCys2_2	0.556214	3.16232	0.175888	9.96e-10
SbCys12-SbCys10	0.864265	3.33115	0.25945	5.35e-09
SbCys12-SbCys15	0.690085	2.44636	0.282087	1.71e-05
SbCys10-SbCys14	0.667486	3.52999	0.18909	2.09e-09
SbCys10-SbCys15	0.402929	2.9618	0.136042	1.53e-20
SbCys10-SbCys16	1.10035	3.55483	0.309536	1.18e-08
SbCys10-SbCys11	0.398884	3.15218	0.126542	1.92e-15
SbCys14-SbCys15	0.525096	3.39574	0.154633	7.2e-09
SbCys14-SbCys16	1.34404	2.37647	0.565561	0.0512224
SbCys14-SbCys11	0.625262	1.69227	0.369481	0.00034796
SbCys15-SbCys16	0.350485	1.8699	0.187435	3.75e-09
SbCys15-SbCys11	0.360237	3.1417	0.114663	4.69e-17
SbCys15-SbCys17	0.172827	1.67611	0.103112	7.65e-10
SbCys16-SbCys11	0.357019	3.27069	0.109157	6.73e-15
SbCys16-SbCys17	0.321202	2.47022	0.13003	1.65e-08
SbCys13-SbCys5	0.425599	1.94477	0.218843	9.62e-09
SbCys13-SbCys9	0.528998	1.71454	0.308537	8.51e-05
SbCys11-SbCys5	0.584624	3.33278	0.175416	1.07e-12
SbCys17-SbCys11	0.401267	1.54413	0.259866	7.33e-06
SbCys9-SbCys13	0.528344	2.4962	0.211659	9.22e-06
SbCys9-SbCys4	0.737186	1.88765	0.390531	0.000509931
SbCys4-SbCys2_1	0.332189	3.08466	0.107691	2.2e-13
SbCys4-SbCys2_2	0.295798	3.0311	0.0975876	2.86e-21
