# Supplementary material for: Genome-wide identification and analysis of cystatin family genes in Sorghum (Sorghum bicolor (L.) Moench)
Source: PeerJ. 2021 Jan 21;9:e10617. doi: 10.7717/peerj.10617 (PMC7827979; doi:10.7717/peerj.10617)
Supplement: Supplemental Information 8 [file peerj-09-10617-s008.xlsx]

## Sheet: Sheet1
Table S5 The number of promoter elements of each SbCys gene.
cis-elements	ABRE	G-box	GCN4_motif	HSE	MBS	Skn-1_motif	TC-rich repeats	CCAAT-box	W-box	RY-element	CAAT-box	TATA-box
Function	Involved in abscisic acid response	Involved in light response	Involved in endosperm expression	Heat shock responsive element	Involved in drought inducibility	Required for endosperm expression	Involved in defense and stress response	Enhancer-binding protein element	Wounding and pathogen responsive element	Involved in seed-specific regulation	common cis-acting element in promoter and enhancer regions	core promoter element around -30 of transcription start
SbCys2_1	1	8	1	2	1	2	1				4	4
SbCys1		2		1				1	1		4	5
SbCys4	2	8		4	1	1	2		1	1	5	5
SbCys2_2	1	1	1	2		1	1		2		5	6
SbCys3		3			1	1	1		1		7	7
SbCys5	2	5	1		2	1			1	1	4	3
SbCys6	4	6		1	1						5	4
SbCys7	2	4			2		2	1			4	4
SbCys8	3	5		2	3				2	1	5	5
SbCys9					1	1	2		1		9	5
SbCys10	3	6		2	4			2	1	1	3	2
SbCys11	3	6	1	1	2	1	1			1	7	4
SbCys12	5	7		1							5	3
SbCys13		1	1			1					4	3
SbCys14	1	4	1		2	1					9	4
SbCys15		1			2			1
SbCys16	1	9			1	1						1
SbCys17		1		2	1	1	1				1	1
